# Supplementary material for: Health system costs of potentially inappropriate prescribing in Ontario, Canada: a protocol for a population-based cohort study
Source: PubMed Central journal article supplement — BMJ Open. 2018 Jun 27;8(6):e021727. doi: 10.1136/bmjopen-2018-021727 (PMC6020945; doi:10.1136/bmjopen-2018-021727), 2018-06-27
Supplement: bmjopen-2018-021727.draft_revisions.pdf [file bmjopen-2018-021727.draft_revisions.pdf]

# BMJ Open

BMJ Open is committed to open peer review. As part of this commitment we make the peer review history of every article we publish publicly available.

When an article is published we post the peer reviewers' comments and the authors' responses online. We also post the versions of the paper that were used during peer review. These are the versions that the peer review comments apply to.

The versions of the paper that follow are the versions that were submitted during the peer review process. They are not the versions of record or the final published versions. They should not be cited or distributed as the published version of this manuscript.

BMJ Open is an open access journal and the full, final, typeset and author-corrected version of record of the manuscript is available on our site with no access controls, subscription charges or pay-per-view fees (<http://bmjopen.bmj.com>).

If you have any questions on BMJ Open's open peer review process please email [info.bmjopen@bmj.com](mailto:info.bmjopen@bmj.com)

# BMJ Open

## The health system costs of potentially inappropriate prescribing in Ontario: a population-based cohort study

|                               |                                                                                                                                                                                                                                                                                                                                                                                                                                                             |
|-------------------------------|-------------------------------------------------------------------------------------------------------------------------------------------------------------------------------------------------------------------------------------------------------------------------------------------------------------------------------------------------------------------------------------------------------------------------------------------------------------|
| Journal:                      | <i>BMJ Open</i>                                                                                                                                                                                                                                                                                                                                                                                                                                             |
| Manuscript ID                 | bmjopen-2018-021727                                                                                                                                                                                                                                                                                                                                                                                                                                         |
| Article Type:                 | Protocol                                                                                                                                                                                                                                                                                                                                                                                                                                                    |
| Date Submitted by the Author: | 15-Jan-2018                                                                                                                                                                                                                                                                                                                                                                                                                                                 |
| Complete List of Authors:     | Black, Cody; University of Ottawa, School of Epidemiology and Public Health<br>Thavorn, Kednapa; Ottawa Hospital Research Institute; Institute for Clinical Evaluative Sciences, ICES@uOttawa<br>Coyle, Douglas; University of Ottawa, School of Epidemiology and Public Health<br>Smith, Glenys; Institute for Clinical Evaluative Sciences, ICES@uOttawa<br>Bjerre, Lise; University of Ottawa, Department of Family Medicine; Bruyère Research Institute |
| Keywords:                     | EPIDEMIOLOGY, Health policy < HEALTH SERVICES ADMINISTRATION & MANAGEMENT, Health economics < HEALTH SERVICES ADMINISTRATION & MANAGEMENT, THERAPEUTICS                                                                                                                                                                                                                                                                                                     |
|                               |                                                                                                                                                                                                                                                                                                                                                                                                                                                             |

SCHOLARONE™  
Manuscripts

1  
2  
3 **Title:** The health system costs of potentially inappropriate prescribing in Ontario: a population-  
4 based cohort study  
5

6  
7 **Authors:** Cody D. Black<sup>1</sup>, Kednapa Thavorn<sup>1,2,3</sup>, Doug Coyle<sup>1</sup>, Glenys Smith<sup>3</sup>, Lise M.  
8 Bjerre<sup>1,3,4,5\*</sup>  
9

- 10 1. School of Epidemiology and Public Health, University of Ottawa, Ottawa, Ontario  
11 Canada
  - 12 2. Ottawa Hospital Research Institute, The Ottawa Hospital, Ottawa, Canada
  - 13 3. ICES@uOttawa, Institute for Clinical Evaluative Sciences, Ottawa, Ontario, Canada
  - 14 4. Department of Family Medicine, University of Ottawa, Ottawa, Ontario, Canada
  - 15 5. Bruyère Research Institute, Ottawa, Canada
- 16  
17  
18  
19

20 **\*Corresponding Author:** 43 Bruyere St. Ottawa, Canada, K1N 5C8, 613-562-6262 ext. 2942,  
21 [lbjerre@bruyere.org](mailto:lbjerre@bruyere.org)  
22  
23  
24

25 **Word count:** 3478 (excluding title page, abstract, references, figures and tables)  
26  
27  
28

29 **Keywords:** Potentially Inappropriate Prescribing, healthcare expenditures, STOPP/START  
30 criteria, healthcare services utilization  
31  
32  
33  
34  
35  
36  
37  
38  
39  
40  
41  
42  
43  
44  
45  
46  
47  
48  
49  
50  
51  
52  
53  
54  
55  
56  
57  
58  
59  
60

## ABSTRACT

### Introduction

Adverse drug events (ADE) are common in the elderly and contribute significantly to emergency department (ED) visits, hospitalizations and mortality. ADEs are often due to potentially inappropriate prescriptions, or omissions, (PIP) and are avoidable if inappropriate prescriptions or omissions are identified and prevented. Identifying PIP at the population-level through the application of PIP assessment tools to health administrative data can provide a unique opportunity to assess the economic burden of PIP on the health care system beyond medication costs, which has yet to be done. The objective of this study is to assess the economic burden associated with PIP and to estimate the incremental costs associated with distinct PIPs in the province of Ontario.

### Methods and analysis

We will conduct a retrospective cohort study using Ontario's health administrative databases. Eligible patients aged 66 years of age and older who were prescribed at least 1 medication between 1 April 2003 and 31 March 2014 (approximately 2.4 million patients) will be included. Population attributable fraction methodology will be used to assess the overall burden of PIP in Ontario, while regression analyses will be used to estimate the incremental costs of having specific PIP criteria and aid in prioritizing targets for intervention.

### Ethics and dissemination

This study was approved by the institutional review board at Sunnybrook Health Sciences Centre, Toronto, Canada. Dissemination will occur via publication, presentation at national and international conferences, and knowledge exchange with various stakeholders.

### STRENGTHS AND LIMITATIONS OF THIS STUDY

- This unique study provides an analytical framework to estimate the economic impact of potentially inappropriate prescribing (PIP) at the population level.
- This study benefits from being able to incorporate costs of hospitalization and emergency department visits in addition to medication costs in the assessment of PIP-related costs, as well as the ability to adjust for potential confounders beyond age and sex, providing a less biased estimate of costs associated with PIP.
- This study has limitations common to studies using health administrative data, primarily uncertainty surrounding patient adherence to medication and lack of documentation of some potential confounders.
- Identifying the overall costs associated with PIP would provide further evidence to support PIP as a high priority for healthcare decision-makers, while characterizing the costs of specific PIP scenarios would provide these decision-makers with actionable targets to address PIP.

## INTRODUCTION

### Background

Adverse drug events (ADE) are common in the elderly due to physiological vulnerability associated with aging and disease [1]. These contribute significantly to emergency department (ED) visits, unplanned hospitalizations [2], and in-hospital morbidity and mortality [3]. Many of these ADEs are due to potentially inappropriate prescriptions (PIP) or potentially inappropriate omissions (PIO) and are avoidable if inappropriate prescriptions and or omissions are identified and prevented. PIP/PIO is also most common in the elderly and its likelihood increases as patients are prescribed more drugs than may be clinically necessary, which is defined as polypharmacy.

A number of tools have been developed to identify PIP/PIO (referred to as PIP from now on unless otherwise specified) in clinical settings, including the STOPP/START criteria [4] (Screening Tool of Older Persons' Potentially Inappropriate Prescribing /Screening Tool to Alert doctors to Right Treatment) and the Beers criteria [5–9]. These tools are time-consuming and costly to apply individually and are under-used. Applying these tools to assess the appropriateness of prescribing to population-wide health administrative data can provide a unique opportunity to assess both the frequency of PIP and its associated costs, in terms of medication and health services use, at both the individual and population-level.

### Evidence gaps to be filled

PIP is associated with increased costs and health services use according to studies conducted in Ireland and the UK [10–12], but its economic impact in Canada is unknown. The PIP-STOPP study is a CIHR-funded project with the aim of using subsets of the STOPP/START and Beers' criteria applicable to health administrative data housed at the Institute for Clinical Evaluative Sciences (ICES) to identify PIP and PIO at the population-level in Ontario, its association with hospitalizations, ED visits and mortality, and health system costs [13].

Identifying the overall health system costs associated with PIP would provide further evidence to support PIP as a high priority for decision-makers by quantifying its overall health system burden, while characterizing the costs of specific PIP scenarios would provide these decision-makers with actionable targets to address PIP through a better understanding of the flow of costs attributable to different PIP scenarios and the identification of higher cost-burden PIPs.

This study protocol details the methods to assess the health system costs associated with PIP overall in Ontario, as well as to estimate the incremental costs of PIP scenarios which vary by their downstream healthcare resource use and by frequency. To address these knowledge gaps, the objectives of this study are to:

1. Assess the overall health system costs associated with PIP in Ontario
2. Estimate the incremental costs associated with distinct PIP scenarios occurring in Ontario

## METHODS

Methods regarding the study design, participants, datasets, exposure and cohort size for this study have been extensively described previously in the published protocol of its parent study [13] and are only summarized here. The methods common to both objectives, including study design, participants, and data sources are listed first, followed by the exposure, outcomes, covariates and statistical analyses relevant to each objective.

### Study Design

A population-based, retrospective cohort study design will be used, identical to that from previous publications form a larger retrospective, population-based cohort study on the identification of PIP and predicting patient outcomes in Ontario [13].

#### Definition of observation periods

The study period will span from 1 April 2002 to 31 March 2015, which is based on the availability of the necessary databases. The patient accrual period will be from 1 April 2003 to 31 March 2014, allowing for a one-year lookback period for prior health services utilization and baseline covariates, as well as a one-year follow-up period after the last possible PIP to allow time for identification of associated outcomes, **Figure 1**. We have chosen a 90-day observation window following instances of PIP in which to identify outcomes, since it is unlikely the potential influence of PIP would extend beyond this period.

### Participants

From the data housed at ICES, a large cohort of patients who are eligible for the study (approximately 2 million participants) has been identified. These patients are Ontario residents aged 66 years and older with Ontario Health Insurance Plan drug coverage (approximately 97% of Ontario seniors) who have been dispensed at least one prescription between April 1, 2003, and March 31, 2014.

### Data sources

The proposed project will use population-level health administrative data from Ontario, which is housed at ICES [14,15]. Accessing data through ICES allows for the linking of demographic, socioeconomic, hospital and outpatient health services, physician billing datasets, and prescription dispensation to Ontarians aged 65 years or older, or those requiring social assistance [16]. Cost data are available for all physician claims, hospitalizations, ambulatory care services, home care services, long-term and complex continuing care, and medical devices in Ontario, while prescription medication cost data are available for those 65 years of age or older and those requiring social assistance. The following datasets will be linked to gather the appropriate and available exposure, outcome and covariate data necessary for analyses: Ontario Drug Benefits Claims Database (ODBD), Discharge Abstract Database (DAD), Same Day Surgery Database (SDS), National Ambulatory Care Reporting System (NACRS), OHIP database, Registered Persons Database (RPDB) (see Appendix A for brief description of each). Additionally, five ICES-derived cohorts will be used for case ascertainment for specific STOPP/START criteria

1  
2  
3 requiring the following diagnoses: asthma, diabetes, hypertension, chronic obstructive  
4 pulmonary disease (COPD) and congestive heart failure (CHF).  
5

### 6 7 **Objective 1 – Overall health system costs due to PIP**

#### 8 9 Exposure

10 The subset of STOPP/START criteria applicable to health administrative databases were  
11 identified based on the availability of the data necessary for their use and coded into a format  
12 applicable to ICES-housed health administrative data using a combination of medication,  
13 diagnostic (i.e. International Classification of Diseases), health care services utilization and  
14 physician billing codes. A manuscript describing the coding process in detail will soon be  
15 available [17].  
16  
17

18 The exposure of interest will be the first occurrence of any PIP identified in HAD for each  
19 patient in the cohort during the study accrual period from April 1 2003 to March 31 2014.  
20 Unexposed patients will be those who have not experienced any PIP during the study accrual  
21 period.  
22  
23

#### 24 25 Outcome

26 The primary outcome will be the combined medication, hospitalization and ED visit costs  
27 attributable to PIP over the entire study period paid by the Ontario Ministry of Health and Long-  
28 Term Care. These costs, from documented clinical events attributable to PIP, will be identified  
29 via population attributable fraction (PAF) methods [18,19]. To identify costs, the ICES costing  
30 algorithm will be used [20]. This algorithm allows for the identification of costs from any health  
31 services covered by the Ontario Health Insurance Plan over a defined time-period [20]. All costs  
32 will be inflated to 2015 Canadian dollars using Statistic Canada's Consumer Price Index [21].  
33 The PAF estimates for hospitalizations, ED visits and medications will be derived via the  
34 incidence rate ratios (IRR) obtained from Poisson or negative binomial regression models for  
35 each outcome, described in further detail in the statistical analyses section. Each PAF estimate  
36 will then be multiplied by the total cost of their respective health care service over the study  
37 period for the whole population, which will be totaled to obtain the total costs attributable to PIP  
38 over the study period.  
39  
40  
41  
42  
43

44 Though we realize not all hospitalizations and ED visits will be causally related with PIP, ADEs  
45 are frequently under-recognized during ED visits and hospitalization [22,23]. As such, we chose  
46 to use reliably documented clinical events (hospitalization and ED visits) and their costs, along  
47 with medication costs, as most suitable for the primary outcome. These costs were selected as  
48 they are the costs associated with the most reliably documented clinical events and those most  
49 likely to be linked to PIP. For medication costs, only those attributable to STOPP criteria will be  
50 determined and patients with PIP who either have a START criterion as their first PIP, or as one  
51 of multiple first PIPs, will be excluded from this analysis. This is to ensure all drug costs are  
52 attributable to the prescribing of a medication (i.e. STOPP criteria) and not to the omission of  
53 medication (i.e. START criteria), which would in fact be 'negative' costs.  
54  
55  
56  
57  
58  
59  
60



## Covariates

Analyses will be adjusted for potential confounders which are available through provincial health administrative databases and either known or perceived to be associated with PIP or with our outcomes of interest (i.e. hospitalization, ED visits and medication use), including age [24,25], sex [25], income quintile [25,26], rurality, aggregated diagnosis group (ADG) score (i.e. comorbidity status) [25,27,28], number of unique drug identification numbers (i.e. pills prescribed concurrently) in year prior to PIP [29–33], number of prescribers in year prior to PIP [34], whether the patient had a MedsCheck (billable medication review performed by a pharmacist, usually in the community) in year prior to PIP, number of days spent in hospital in year prior to PIP, ED visit in 6 months prior to PIP [24,25,27,35–39].

For this objective, the ascertainment of covariate status will be done at the PIP date for participants experiencing a PIP and at the randomly assigned index date for participants who do not experience a PIP, as further described below.

## Statistical analyses

The direct costs associated with the occurrence of any first PIP in Ontario will be estimated by combining medication and non-medication related costs attributable to PIP via the steps below.

### *Assignment of time-to-PIP for unexposed patients*

To estimate the health system costs due to PIP, it is necessary to compare the number of days spent in hospital, the number of ED visits, and the volume of medications in participants with and without PIP. To do this, we will need to assign an index date to participants without PIP so that they have comparable lookback and observation windows for covariate and outcome ascertainment, respectively. The index date for participants not experiencing a PIP will be treated as missing at random. We will conduct parametric survival analysis on the participants within the cohort who have experienced a PIP, with their time-to-first PIP from cohort entry as the response variable in the model. The models will be stratified by sex and median-age during cohort participation according to the following categories: 66-70, 71-75, 76-80, 81-85, 86-90, over 90. The models will be fitted to identify the appropriate distribution for its random error component. Once the best fitting model has been identified, the resulting distribution and appropriate shape and scale parameters, depending on the distribution identified, will be applied to the participants without a PIP via the random number function in SAS [40] in order to randomly assign them a PIP date and identify the start of their 90-day observation window. This random assignment will be done twice, with the first randomly assigned PIP index used for the primary analyses and most other subgroup and sensitivity analyses, while the second will be used to conduct a sensitivity analysis to determine whether the random assignment method used impacts study results. Participants with an assigned PIP date that falls beyond the end of their follow-up period will be excluded from all analyses. For both exposed and unexposed participants, we will

determine whether they have at least 90 days between their PIP date and the end of their follow-up. If this difference is less than 90 days participants will be removed from the analysis.

This approach to assignment of an index date in non-PIP participants was selected over simple random assignment of time-to-PIP since the underlying distribution of time-to-first PIP in participants experiencing PIP is unknown and is not believed to be normally distributed, and is also thought to vary by age and sex. Matching cannot be conducted due to the high prevalence of PIP in the population resulting in a difficulty to find suitable matches for all participants with a PIP. Additionally, the first day of a participant's inclusion in the study population for participants without PIP cannot be used as their PIP date as this would make the unexposed group systematically younger than those exposed to PIP during analyses, resulting in confounding that may not be completely adjusted for even though age is being included in analyses as a covariate.

#### *Medication use, ED visits and hospitalizations attributable to PIP*

The IRRs for ED visits, days spent in hospital and medications for participants with PIP versus those without PIP will be determined via parameter estimates for the PIP variable from regression models for count data. Three models will be created, each with the response variable of either count of ED visits, days spent in hospital and total number of unique, newly prescribed medications in the 90-day period following their PIP date for participants with PIP, or the randomly assigned index date for participants not experiencing a PIP. Each of the models will be adjusted for the covariates listed previously. For each outcome, either a Poisson or negative binomial model will be fitted based on a comparison of the mean of the response variable with its variance to determine if overdispersion is present [41]. Should the mean and variance be equal, or approximately so, then the Poisson model will be used. If the variance is greater and proportional to the mean, indicating overdispersion, then the negative binomial model will be used. The IRRs obtained via the parameter estimate for the PIP variable in the best fitting model for each outcome will be used to derive their respective population attributable fraction (PAF) in combination with the proportion of the population exposed to PIP ( $P_{exp}$ ), obtained directly from our cohort as the PIP prevalence in the whole study population, via Levin's formula:  $((P_{exp} * (RR - 1)) / ((P_{exp} * (RR - 1)) + 1)) * 100$  [18,19].

#### *Total costs attributable to PIP*

The respective PAFs for ED visits, days spent in hospital and medications will be multiplied by the total costs for each of these health services, respectively, to obtain the total cost of each service use attributable to PIP over the study period. These costs will then be combined to obtain the total health system costs attributable to PIP over the study period. The same methods will be used to obtain costs attributable to PIP by year.

#### *Subgroup analyses*

Similar methods to those listed above will be conducted in order to obtain the costs attributable to PIP by age, categorized by the median age of cohort participation based on the categories

described above, and sex. Additionally, a subgroup analysis for the ED visit and hospitalization costs will be conducted based on whether a patient's first PIP was a STOPP or START criteria, with patients experiencing multiple first PIPs excluded.

## Objective 2 – Incremental costs of specific PIP criteria

### Exposure

PIP will be identified using the same methods described in objective 1. Specific PIP criteria will be selected for the assessment of the incremental costs associated with each of them. For each of the criteria studied, the exposure of interest will be the first time the PIP of interest occurred for each participant in the cohort. Exposed participants must have never experienced another PIP prior to the PIP date, as well as during the 90-day observation window. Unexposed participants will not have experienced any PIP during their cohort participation.

To identify the PIPs to model, each of the individual PIPs applicable to health administrative data was plotted on a graph according to their frequency (y-axis) by their crude average healthcare services costs (i.e. medication, hospitalization and ED visits combined (x-axis), **Figure 2**. Two STOPP criteria falling on the high frequency/high-cost plane were identified due to their potential for being high impact PIPs, along with a high frequency START criterion which also fell on this plane. A low frequency/low cost STOPP criteria was chosen to be used for comparison. The PIPs identified were: START A6, STOPP J6, STOPP K2, STOPP D8. START A6 is defined as the omission of Angiotensin Converting Enzyme (ACE) inhibitor with systolic heart failure and/or documented coronary artery disease. STOPP K2 is defined as the use of any neuroleptic drug. STOPP D8 is flagged as a PIP when anticholinergics and or antimuscarinics are prescribed in participants with delirium or dementia, due to risk of exacerbation of cognitive impairment. The final selected PIP, STOPP J6, is defined as the prescribing of androgens (male sex hormones) in the absence of primary or secondary hypogonadism. The full definitions as they appear in the STOPP/START criteria for each of the selected criteria are described in **Table 1**, along with their categorized frequency and crude costs [4].

### Outcome

The outcome will be the combined hospitalization, ED visit and PIP medication costs in the 90-day period following the PIP date. The ED visit and hospitalization costs will be obtained via the ICES costing algorithm [20] and inflated to 2015 Canadian dollars. Like the hospitalization and ED visit costs, we will attempt to obtain the PIP medication cost via the ICES costing algorithm, though it may not be possible to obtain only the medication cost for the PIP medication, as the macro currently obtains all medication costs over a designated period as opposed to the costs of each individual medication. Should we be unable to obtain PIP medication costs via the macro, we will identify the lowest hypothetical medication costs for each PIP via the Prescribe Smart

1  
2  
3 mobile application [42], which provides the drug unit price of all available drugs within Ontario  
4 and allows for easy comparison within class, at the World Health Organization Defined Daily  
5 Dose for each drug [43]. The drug cost of a daily dose will be multiplied by 90 to obtain the most  
6 conservative estimate of a 90-day supply to match the observation window. The highest and  
7 median prices for each PIP will also be obtained and utilized in sensitivity analyses, should this  
8 approach be used, to observe the PIP costing method's impact on incremental costs.  
9  
10

### 11 12 13 Covariates

14  
15 The covariates of interest for objective 2 will be the same as in objective 1. Where they differ is  
16 in the assignment of the PIP date for ascertainment of covariate status in participants not  
17 experiencing a PIP. In objective 2, a subset of participants not experiencing a PIP will be  
18 selected for inclusion into the analysis based on having an exact, or similar, index date as a  
19 participant with a PIP. Once included, participants without a PIP will be assigned the same PIP  
20 date as the person with whom they share the exact or similar index date. This approach to  
21 participant inclusion and PIP date assignment has been selected since an efficient approach for  
22 participant selection and PIP date assignment that would be least likely to bias study results is  
23 necessary. The number of participants with the PIPs of interest ranges from several thousand to  
24 over 200,000, thus the number of unexposed participant's needs to be reduced in size for each of  
25 the analyses, precluding the inclusion of all unexposed participants in the cohort. Additionally,  
26 the index date is the least likely of all available covariates at time of participant selection to be  
27 associated with PIP or cost and outcomes, thus reducing the potential of introducing bias in  
28 participant selection.  
29  
30  
31  
32

### 33 Statistical analyses

34  
35 The incremental costs associated with having each of the individual PIP criterion described in  
36 **Table 1** versus not having the PIP in question will be modelled using regression analyses. Due to  
37 the typical distribution associated with cost data, multiple candidate models will be assessed to  
38 identify the model that best fits the data. This process will begin with the fitting of an ordinary  
39 least squares regression and assessment of model fit, as well as a check for heteroscedasticity. If  
40 there is evidence of heteroscedasticity, we will then proceed with the selection of a generalized  
41 linear model. The link function and variance structure to be used will be determined using the  
42 TRANSREG function in SAS and modified Park's test, respectively. Should the Poisson  
43 variance structure be selected, the mean of the costs will be compared to the variance to  
44 determine whether overdispersion is present and whether a negative binomial model is preferred.  
45 All candidate models will be adjusted for the covariates described above. Each model's  
46 performance will be assessed using the Bayesian information criterion (BIC) and graphical check  
47 of the distribution fit comparing the distribution of the predicted values with the expected values.  
48  
49  
50  
51  
52  
53  
54  
55  
56  
57  
58  
59  
60

## **ETHICS AND DISSEMINATION**

### **Ethical approval, safety and confidentiality considerations**

This study was approved by the institutional review board at Sunnybrook Health Sciences Centre, Toronto, Canada. This study makes use of previously collected health administrative databases housed at ICES, accessed from ICES@uOttawa, and does not require any additional intervention or data collection at the patient level. ICES links de-identified population-based health information at the population level in a way that ensures privacy and confidentiality to participants. As per ICES procedures, cell sizes of less than five will not be reported to address concerns about possible breaches of confidentiality.

### **Dissemination**

Dissemination will primarily occur via publication of study results and presentation at national and international conferences. Professional networks will be utilized to promote dissemination with various stakeholders, including health policy makers at the provincial and national levels.

### **Statement of originality**

The assessment of the economic burden of PIP and PIO at the population-level using linked health administrative databases is the first of its kind in any jurisdiction to the best of our knowledge. This is the first study of its kind leveraging linked health administrative databases to assess the health services costs of PIP and PIO beyond the medication costs alone, as well as the first study that will be able to adjust for potential confounders beyond age and sex.

### **Anticipated limitations**

Our study is subject to limitations that are common to studies relying on health administrative databases which may affect our estimates of the prevalence of PIP and associated costs. It cannot be confirmed that participants adhered to the instructions regarding the medications dispensed to them, or regularly took them. Adherence to medication can only be assessed by comparing the date when an original prescription was scheduled to expire with the dispensation date of the renewal prescription. It is also difficult to determine whether some of the PIP identified by the STOPP/START criteria are indeed inappropriate without clinical or diagnostic data that are unavailable to us [44]. Some of the STOPP/START criteria include over-the-counter medications or medications that are not covered by Ontario's public medication plan (ODB), and thus are not captured in the ODB database (ODBD) or identified as a PIP in our database. Additionally, we are unable to determine the cost of PIP medications from the linked health administrative databases due to the complexity and time required to identify specific prescriptions from a total of over half a billion prescriptions. As such, a conservative approach will be used to identify medication costs as described in the outcomes section. Despite these limitations, we are confident our study will produce useful, conservative estimates of the health system costs associated with PIP.

## **AUTHOR CONTRIBUTIONS**

LMB wrote the original grant application for this project and conceived the initial idea. CB led the development of this subsequent protocol. The final methodology listed in this protocol was developed collaboratively by CB, LMB, KT, DC and GS, with LMB, KT, DC and GS providing expertise in their respective fields. Additionally, CB, LMB, KT, DC and GS reviewed the manuscript for important intellectual content, made suggestions for improvement as appropriate, and approved the final version.

## **COMPETING INTERESTS**

None to declare

## **FUNDING**

This work was supported by the Canadian Institutes of Health Research (CIHR), grant number 287245-HPM-BRUY-46830 (Principal investigator: Dr. Lise M. Bjerre). CB is supported by a CIHR Drug Safety and Effectiveness Cross-disciplinary Training program traineeship and a University of Ottawa Excellence Scholarship.

## Tables and Figures

**Table 1.** Definitions for PIP criteria to be modelled as part of the second objective, along with their frequency and cost classification

| PIP         | Definition                                                                                                                                                               | PIP Frequency | Costs |
|-------------|--------------------------------------------------------------------------------------------------------------------------------------------------------------------------|---------------|-------|
| START<br>A6 | Angiotensin Converting Enzyme (ACE) inhibitor with systolic heart failure and/or documented coronary artery disease                                                      | High          | Mid   |
| STOPP<br>K2 | Neuroleptic drugs                                                                                                                                                        | Mid           | Mid   |
| STOPP<br>D8 | Anticholinergics/antimuscarinics in patients with delirium or dementia (risk of exacerbation of cognitive impairment)                                                    | Low           | High  |
| STOPP<br>J6 | Androgens (male sex hormones) in the absence of primary or secondary hypogonadism (risk of androgen toxicity; no proven benefit outside of the hypogonadism indication). | Low           | Low   |

1  
2  
3 **Figure 1.** Definition of observation period  
4

5 **Figure 2.** Assessment of PIP frequency by crude costs (from hospitalizations, emergency  
6 department visits and medications) to determine PIP scenarios to be modelled.  
7  
8  
9  
10  
11  
12  
13  
14  
15  
16  
17  
18  
19  
20  
21  
22  
23  
24  
25  
26  
27  
28  
29  
30  
31  
32  
33  
34  
35  
36  
37  
38  
39  
40  
41  
42  
43  
44  
45  
46  
47  
48  
49  
50  
51  
52  
53  
54  
55  
56  
57  
58  
59  
60

For peer review only



**REFERENCES**

1. Spinewine A, Schmader KE, Barber N et al. Appropriate prescribing in elderly people: how well can it be measured and optimised? *Lancet*. 2007;370(1474):173–84.
2. Laroche ML, Charmes JP, Nouaille Y et al. Is inappropriate medication use a major cause of adverse drug reactions in the elderly? *Br J Clin Pharmacol*. 2007;63(306):177–86.
3. Lazarou J, Pomeranz BH, Corey PN. Incidence of adverse drug reactions in hospitalized patients: a meta-analysis of prospective studies. *JAMA*. 1998;279(0098–7484):1200–5.
4. O’Mahony D, O’Sullivan D, Byrne S et al. STOPP/START criteria for potentially inappropriate prescribing in older people: version 2. *Age Ageing*. 2015;44(2):213–8.
5. Beers MH, Ouslander JG, Rollinger I et al. Explicit criteria for determining inappropriate medication use in nursing home residents. *Arch Intern Med. Am Med Assoc*; 1991;151(9):1825.
6. Beers MH. Explicit Criteria for Determining Potentially Inappropriate Medication Use by the Elderly: An Update. *Arch Intern Med*. 1997;157(14):1531–6.
7. Fick DM, Cooper JW, Wade WE et al. Updating the Beers criteria for potentially inappropriate medication use in older adults: results of a US consensus panel of experts. *Arch Intern Med. Am Med Assoc*; 2003;163(22):2716.
8. American Geriatrics Society 2012 Beers Criteria Update Expert Panel. American Geriatrics Society updated Beers Criteria for potentially inappropriate medication use in older adults. *J Am Geriatr Soc*. 2012;60(4):616–31.
9. American Geriatrics Society 2015 Beers Criteria Update Expert Panel. American Geriatrics Society 2015 Updated Beers Criteria for Potentially Inappropriate Medication Use in Older Adults. *J Am Geriatr Soc*. 2015;63(11):2227–46.
10. Bradley M, Fahey T, Cahir C et al. Potentially inappropriate prescribing and cost outcomes for older people: a cross-sectional study using the Northern Ireland Enhanced Prescribing Database. *Eur J Clin Pharmacol*. 2012;68(10):1–9.
11. Shah SM, Carey IM, Harris T et al. Quality of prescribing in care homes and the community in England and Wales. *Br J Gen Pract*. 2012;62(598):e329–36.
12. Goltz L. Original Research-Potentially inappropriate prescribing for elderly outpatients in Germany: a retrospective claims data analysis. *Int J Clin Pharmacol Ther*. 2012;50(3):185.
13. Bjerre L, Ramsay T, Cahir C et al. Assessing potentially inappropriate prescribing (PIP) and predicting patient outcomes in Ontario’s older population: a population-based cohort study applying subsets of the STOPP/START and Beers’ criteria in large health administrative databases. *BMJ Open*. 2015;5(e010156).
14. Bronskill S, Carter M, Costa A et al. Aging in Ontario : An ICES Chartbook of Health Service Use by Older Adults [Internet]. 2010. Available from: <https://www.ices.on.ca/Publications/Atlases-and-Reports/2010/Aging-in-Ontario>
15. Institute for Clinical Evaluative Sciences (ICES). Health Services Data.

- 1  
2  
3 [http://www.ices.on.ca/webpage.cfm?site\\_id=1&org\\_id=26&morg\\_id=0&gsec\\_id=5314&item\\_id=5326](http://www.ices.on.ca/webpage.cfm?site_id=1&org_id=26&morg_id=0&gsec_id=5314&item_id=5326). 2011.
- 4  
5  
6 16. Institute for Clinical Evaluative Sciences. ICES Data Dictionary [Internet]. 2016.  
7 Available from:  
8 <https://datadictionary.ices.on.ca/Applications/DataDictionary/Default.aspx>  
9
- 10 17. Bjerre L, Halil R, Catley C et al. Identifying potentially inappropriate prescribing in whole  
11 populations: Coding the STOPP/START and Beers criteria for use with large, routinely  
12 collected population datasets. Manuscr Prep. 2017;  
13
- 14 18. Rockhill B, Newman B, Weinberg C. Use and misuse of population attributable fractions.  
15 *Am J Public Heal.* 1998;88(1):15–9.  
16
- 17 19. Levin M. The occurrence of lung cancer in man. *Acta Union Int Contra Cancrum.*  
18 1953;9(531–41).  
19
- 20 20. Wodchis W, Buchmeneva K, Nikitovic M et al. Guidelines on person-level costing using  
21 administrative databases in Ontario [Internet]. Toronto; 2013. Report No.: 1. Available  
22 from:  
23 [http://www.hsprn.ca/uploads/files/Guidelines\\_on\\_PersonLevel\\_Costing\\_May\\_2013.pdf](http://www.hsprn.ca/uploads/files/Guidelines_on_PersonLevel_Costing_May_2013.pdf)  
24
- 25 21. Statistics Canada. Consumer price indexes. 2017.  
26
- 27 22. Hohl C, Zed P, Brubacher J et al. Do emergency physicians attribute drug-related  
28 emergency department visits to medication- related problems? *Ann Emerg Med.*  
29 2010;55:493–502.  
30
- 31 23. Hohl C, Robitaille C, Lord V et al. Emergency physician recognition of adverse drug-  
32 related events in elder patients presenting to an emergency department. *Acad Emerg Med.*  
33 2005;12:197–205.  
34
- 35 24. Boulton C, Dowd B, McCaffrey D et al. Screening elders for risk of hospital admission. *J*  
36 *Am Geriatr Soc.* 1993;41(8):811–7.  
37
- 38 25. Anderson GF, Steinberg EP. Predicting hospital readmissions in the Medicare population.  
39 *Inquiry.* 1985;22(3):251–8.  
40
- 41 26. Weissman J, Stern R, Epstein A. The impact of patient socioeconomic status and other  
42 social factors on readmission: a prospective study in four Massachusetts hospitals.  
43 *Inquiry.* 1994;31(2):163–72.  
44
- 45 27. Krumholz HM, Parent EM, Tu N et al. Readmission after hospitalization for congestive  
46 heart failure among Medicare beneficiaries. *Arch Intern Med.* 1997;157(1):99–104.  
47
- 48 28. MH C, L G. Correlates of early hospital readmission or death in patients with congestive  
49 heart failure. *Am J Cardiol.* 1997. p. 1640–4.  
50
- 51 29. Hajjar ER, Cafiero AC, Hanlon JT. Polypharmacy in elderly patients. *Am J Geriatr*  
52 *Pharmacother.* Elsevier; 2007;5(4):345–51.  
53
- 54 30. Bates DW, Miller EB, Cullen DJ et al. Patient risk factors for adverse drug events in  
55 hospitalized patients. ADE Prevention Study Group. *Arch Intern Med.* 1999;159(0003–  
56  
57  
58  
59  
60

- 1  
2  
3 9926):2553–60.  
4  
5 31. Carey IM, De WS, Harris T et al. What factors predict potentially inappropriate primary  
6 care prescribing in older people? Analysis of UK primary care patient record database.  
7 *Drugs Aging*. 2008;25(1170–229X):693–706.  
8  
9 32. Evans RS, Lloyd JF, Stoddard GJ et al. Risk factors for adverse drug events: a 10-year  
10 analysis. *Ann Pharmacother*. 2005;39(1060–0280):1161–8.  
11  
12 33. Kanjanarat P, Winterstein AG, Johns TE et al. Nature of preventable adverse drug events  
13 in hospitals: a literature review. *Am J Heal Syst Pharm*. 2003;60(1079–2082):1750–9.  
14  
15 34. Dhalla IA, Anderson GM, Mamdani MM et al. Inappropriate prescribing before and after  
16 nursing home admission. *J Am Geriatr Soc*. 2002;50(0002–8614):995–1000.  
17  
18 35. Phillips RS, Safran C, Cleary PD et al. Predicting emergency readmissions for patients  
19 discharged from the medical service of a teaching hospital. *J Gen Intern Med*.  
20 1987;2(6):400–5.  
21  
22 36. Reed RL, Pearlman R a, Buchner DM. Risk factors for early unplanned hospital  
23 readmission in the elderly. *J Gen Intern Med*. 1989;6(3):223–8.  
24  
25 37. Corrigan JM, Martin JB. Identification of factors associated with hospital readmission and  
26 development of a predictive model. *Health Serv Res*. 1992;27(1):81–101.  
27  
28 38. Colledge NR, Ford MJ. The early hospital readmission of elderly people. *Scott Med J*.  
29 1994;39(2):51–2.  
30  
31 39. van Walraven C, Mamdani M, Fang J et al. Continuity of care and patient outcomes after  
32 hospital discharge. *J Gen Intern Med*. 2004;19(6):624–31.  
33  
34 40. SAS Institute Inc. SAS® 9.4 Functions and CALL Routines: Reference, Fifth Edition.  
35 Cary, NC; 2016.  
36  
37 41. Weaver C, Ravani P, Oliver M et al. Analyzing hospitalization data: potential limitations  
38 of Poisson regression. *Nephrol Dial Transpl*. 2015;30:1244–9.  
39  
40 42. Litman J. Prescribe Smart Application. Ottawa, ON; 2016.  
41  
42 43. WHO Collaborating Centre for Drug Statistics Methodology. ATC/DDD Index 2018  
43 [Internet]. 2018. Available from: [https://www.whocc.no/atc\\_ddd\\_index/](https://www.whocc.no/atc_ddd_index/)  
44  
45 44. Ryan C, O’Mahony D, O’Donovan DÓ et al. A comparison of the application of  
46 STOPP/START to patients’ drug lists with and without clinical information. *Int J Clin*  
47 *Pharm*. 2013;35(2):230–5.  
48  
49  
50  
51  
52  
53  
54  
55  
56  
57  
58  
59

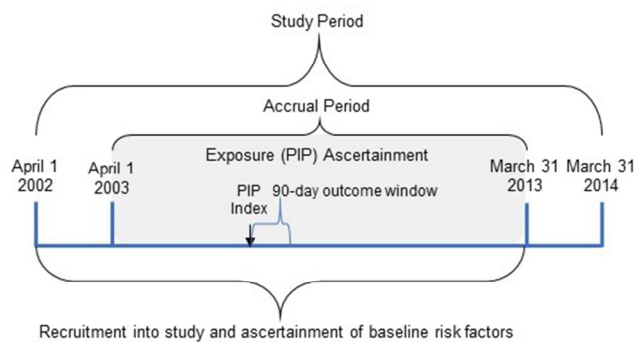

Figure 1. Definition of observation period

190x254mm (96 x 96 DPI)



## Appendix

### A. Brief description of data sources

*Adapted with permission from:*

Bjerre L, Ramsay T, Cahir C et al. Assessing potentially inappropriate prescribing (PIP) and predicting patient outcomes in Ontario's older population: a population-based cohort study applying subsets of the STOPP/START and Beers' criteria in large health administrative databases. *BMJ Open*. 2015;5(e010156).

*Ontario Drug Benefits Claims Database (ODBD)*. The Ontario Drug Benefit program provides drug benefits for all Ontario residents aged 65 and older and those with disability/social assistance benefits. The ODBD contains a number of data related to prescription drugs, including drug identification number (DIN), quantity of drugs provided, number of days supplied (which can be used to compute the daily dose), itemized cost, dispensing fee, long-term care indicators, the plan affiliated with the prescription (e.g. Seniors, Trillium, Ontario Works etc.), the date the drug was dispensed, and patient and prescriber identifiers (encrypted). Additionally, ICES maintains a list linking DINs to their associated drug and product names, subclass information, pharmacologic-therapeutic classification group (PCG) codes, drug strength, route of administration, and first and last dispensing dates from the ODB.[1]

*Discharge Abstract Database (DAD)*. The DAD captures all acute care hospitalizations in Ontario dating back to 1988. Each row in the DAD records demographic, diagnostic, procedural, and treatment information for a given hospitalization. [1]

*Same Day Surgery Database (SDS)*. The SDS contains patient-level data for day surgery institutions in Ontario. Every record corresponds to one same-day surgery or procedure stay. [1]

*National Ambulatory Care Reporting System (NACRS)*. The NACRS captures all visits to hospital EDs beginning in 2002. As with the DAD, each row of the NACRS contains demographic, diagnostic, procedural, and treatment information for each emergency room visit [35]. [1]

*Ontario Health Insurance Plan (OHIP) database*. The OHIP database captures health services billing claims paid by the Ontario Health Insurance Plan to providers. Each row in the OHIP database records the patient, provider, and diagnosis/procedure being claimed for remuneration. [1]

Birth date and death date of every individual eligible for Ontario health service will be obtained from the *Registered Persons Database (RPDB)*. [1]

1. Institute for Clinical Evaluative Sciences. ICES Data Dictionary [Internet]. 2016. Available from: <https://datadictionary.ices.on.ca/Applications/DataDictionary/Default.aspx>

# BMJ Open

## The health system costs of potentially inappropriate prescribing in Ontario, Canada: a protocol for a population-based cohort study

|                                 |                                                                                                                                                                                                                                                                                                                                                                                                                                                             |
|---------------------------------|-------------------------------------------------------------------------------------------------------------------------------------------------------------------------------------------------------------------------------------------------------------------------------------------------------------------------------------------------------------------------------------------------------------------------------------------------------------|
| Journal:                        | <i>BMJ Open</i>                                                                                                                                                                                                                                                                                                                                                                                                                                             |
| Manuscript ID                   | bmjopen-2018-021727.R1                                                                                                                                                                                                                                                                                                                                                                                                                                      |
| Article Type:                   | Protocol                                                                                                                                                                                                                                                                                                                                                                                                                                                    |
| Date Submitted by the Author:   | 14-Mar-2018                                                                                                                                                                                                                                                                                                                                                                                                                                                 |
| Complete List of Authors:       | Black, Cody; University of Ottawa, School of Epidemiology and Public Health<br>Thavorn, Kednapa; Ottawa Hospital Research Institute; Institute for Clinical Evaluative Sciences, ICES@uOttawa<br>Coyle, Douglas; University of Ottawa, School of Epidemiology and Public Health<br>Smith, Glenys; Institute for Clinical Evaluative Sciences, ICES@uOttawa<br>Bjerre, Lise; University of Ottawa, Department of Family Medicine; Bruyère Research Institute |
| <b>Primary Subject Heading</b>: | Health services research                                                                                                                                                                                                                                                                                                                                                                                                                                    |
| Secondary Subject Heading:      | Epidemiology, Health economics                                                                                                                                                                                                                                                                                                                                                                                                                              |
| Keywords:                       | EPIDEMIOLOGY, Health policy < HEALTH SERVICES ADMINISTRATION & MANAGEMENT, Health economics < HEALTH SERVICES ADMINISTRATION & MANAGEMENT, THERAPEUTICS                                                                                                                                                                                                                                                                                                     |
|                                 |                                                                                                                                                                                                                                                                                                                                                                                                                                                             |

SCHOLARONE™  
Manuscripts

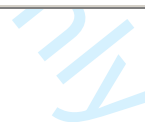

1  
2  
3 **Title:** The health system costs of potentially inappropriate prescribing in Ontario, Canada: a  
4 protocol for a population-based cohort study  
5

6  
7 **Authors:** Cody D. Black<sup>1</sup>, Kednapa Thavorn<sup>1,2,3</sup>, Douglas Coyle<sup>1</sup>, Glenys Smith<sup>3</sup>, Lise M.  
8 Bjerre<sup>1,3,4,5\*</sup>  
9

- 10 1. School of Epidemiology and Public Health, University of Ottawa, Ottawa, Ontario  
11 Canada
  - 12 2. Ottawa Hospital Research Institute, The Ottawa Hospital, Ottawa, Canada
  - 13 3. ICES@uOttawa, Institute for Clinical Evaluative Sciences, Ottawa, Ontario, Canada
  - 14 4. Department of Family Medicine, University of Ottawa, Ottawa, Ontario, Canada
  - 15 5. Bruyère Research Institute, Ottawa, Canada
- 16  
17  
18  
19

20 **\*Corresponding Author:** 43 Bruyere St. Ottawa, Canada, K1N 5C8, 613-562-6262 ext. 2942,  
21 [lbjerre@bruyere.org](mailto:lbjerre@bruyere.org)  
22

23  
24  
25 **Word count:** 3478 (excluding title page, abstract, references, figures and tables)  
26  
27

28  
29 **Keywords:** Potentially Inappropriate Prescribing, healthcare expenditures, STOPP/START  
30 criteria, healthcare services utilization  
31  
32  
33  
34  
35  
36  
37  
38  
39  
40  
41  
42  
43  
44  
45  
46  
47  
48  
49  
50  
51  
52  
53  
54  
55  
56  
57  
58  
59  
60



## ABSTRACT

### Introduction

Adverse drug events (ADE) are common in older persons and contribute significantly to emergency department (ED) visits, hospitalizations and mortality. ADEs are often due to potentially inappropriate prescriptions, or omissions, (PIP) and are avoidable if inappropriate prescriptions or omissions are identified and prevented. Identifying PIP at the population-level through the application of PIP assessment tools to health administrative data can provide a unique opportunity to assess the economic burden of PIP on the health care system beyond medication costs, which has yet to be done. The objective of this study is to assess the economic burden associated with PIP and to estimate the incremental costs associated with distinct PIPs in the province of Ontario.

### Methods and analysis

We will conduct a retrospective cohort study using Ontario's health administrative databases. Eligible patients aged 66 years of age and older who were prescribed at least 1 medication between 1 April 2003 and 31 March 2014 (approximately 2.4 million patients) will be included. Population attributable fraction methodology will be used to assess the overall burden of PIP in Ontario, while regression analyses will be used to estimate the incremental costs of having specific PIP criteria and aid in prioritizing targets for intervention.

### Ethics and dissemination

This study was approved by the institutional review board at Sunnybrook Health Sciences Centre, Toronto, Canada. Dissemination will occur via publication, presentation at national and international conferences, and knowledge exchange with various stakeholders.

### STRENGTHS AND LIMITATIONS OF THIS STUDY

- This unique study provides an analytical framework to estimate the economic impact of potentially inappropriate prescribing (PIP) at the population level.
- This study benefits from being able to incorporate costs of hospitalization and emergency department visits in addition to medication costs in the assessment of PIP-related costs, as well as the ability to adjust for potential confounders beyond age and sex, providing a less biased estimate of costs associated with PIP.
- This study has limitations common to studies using health administrative data, primarily uncertainty surrounding patient adherence to medication and lack of documentation of some potential confounders.
- Identifying the overall costs associated with PIP would provide further evidence to support PIP as a high priority for healthcare decision-makers, while characterizing the costs of specific PIP scenarios would provide these decision-makers with actionable targets to address PIP.

## INTRODUCTION

### Background

Adverse drug events (ADE) are common in older persons due to physiological vulnerability associated with aging and disease [1]. These contribute significantly to emergency department (ED) visits, unplanned hospitalizations [2], and in-hospital morbidity and mortality [3]. Many of these ADEs are due to potentially inappropriate prescriptions (PIP) or potentially inappropriate omissions (PIO) (alternatively named potential prescribing omissions (PPO)) and are avoidable if inappropriate prescriptions and or omissions are identified and prevented. PIP/PIO is also most common in older persons and the likelihood of PIP increases as patients are prescribed more drugs than may be clinically necessary, which is defined as polypharmacy [4].

A number of tools have been developed to identify PIP/PIO (referred to as PIP from now on unless otherwise specified) in clinical settings, including the STOPP/START criteria [5] (Screening Tool of Older Persons' Potentially Inappropriate Prescribing /Screening Tool to Alert doctors to Right Treatment) and the Beers criteria [6–10]. These tools are time-consuming and costly to apply individually and are under-used. Applying these tools to assess the appropriateness of prescribing to population-wide health administrative data can provide a unique opportunity to assess both the frequency of PIP and its associated costs, in terms of medication and health services use, at both the individual and population-level.

### Evidence gaps to be filled

PIP is associated with increased costs and health services use according to studies conducted in Ireland and the UK[11–13], but its economic impact in Canada is unknown. The PIP-STOPP study is a CIHR-funded project with the aim of using subsets of the STOPP/START and Beers' criteria applicable to health administrative data housed at the Institute for Clinical Evaluative Sciences (ICES) to identify PIP and PIO at the population-level in Ontario, its association with hospitalizations, ED visits and mortality, and health system costs [14].

Identifying the overall health system costs associated with PIP would provide further evidence to support PIP as a high priority for decision-makers by quantifying its overall health system burden, while characterizing the costs of specific PIP scenarios would provide these decision-makers with actionable targets to address PIP through a better understanding of the flow of costs attributable to different PIP scenarios and the identification of higher cost-burden PIPs.

This study protocol details the methods to assess the health system costs associated with PIP overall in Ontario, as well as to estimate the incremental costs of PIP scenarios which vary by their downstream healthcare resource use and by frequency. To address these knowledge gaps, the objectives of this study are to:

1. Assess the overall health system costs associated with PIP in Ontario
2. Estimate the incremental costs associated with distinct PIP scenarios occurring in Ontario

## METHODS

Methods regarding the study design, participants, datasets, exposure and cohort size for this study have been extensively described previously in the published protocol of its parent study [14] and are only summarized here. The methods common to both objectives, including study design, participants, and data sources are listed first, followed by the exposure, outcomes, covariates and statistical analyses relevant to each objective.

### Study Design

A population-based, retrospective cohort study design will be used, identical to that from previous publications from a larger retrospective, population-based cohort study on the identification of PIP and predicting patient outcomes in Ontario [14].

#### Definition of observation periods

The study period will span from 1 April 2002 to 31 March 2015, which is based on the availability of the necessary databases. The patient accrual period will be from 1 April 2003 to 31 December 2014, allowing for a one-year lookback period for prior health services utilization and baseline covariates, as well as a 90 day follow-up period after the last possible PIP to allow time for identification of associated outcomes, **Figure 1**. We have chosen a 90-day observation window following instances of PIP in which to identify outcomes, because we do not assume that the potential influence of PIP would extend beyond this period.

### Participants

From the data housed at ICES, a large cohort of patients who are eligible for the study (approximately 2 million participants) has been identified. These patients are Ontario residents aged 66 years and older with Ontario Health Insurance Plan drug coverage (approximately 97% of Ontario seniors) who have been dispensed at least one prescription between April 1, 2003, and March 31, 2014.

### Data sources

The proposed project will use population-level health administrative data from Ontario, which is housed at ICES [15,16]. Accessing data through ICES allows for the linking of demographic, socioeconomic, hospital and outpatient health services, physician billing datasets, and prescription dispensation to Ontarians aged 65 years or older, or those requiring social assistance [17]. Cost data are available for all physician claims, hospitalizations, ambulatory care services, home care services, long-term and complex continuing care, and medical devices in Ontario, while prescription medication cost data are available for those 65 years of age or older and those requiring social assistance. The following datasets will be linked to gather the appropriate and available exposure, outcome and covariate data necessary for analyses: Ontario Drug Benefits Claims Database (ODBD), Discharge Abstract Database (DAD), Same Day Surgery Database (SDS), National Ambulatory Care Reporting System (NACRS), OHIP database, Registered Persons Database (RPDB) (see Appendix A for brief description of each). Additionally, five ICES-derived cohorts will be used for case ascertainment for specific STOPP/START criteria

1  
2  
3 requiring the following diagnoses: asthma, diabetes, hypertension, chronic obstructive  
4 pulmonary disease (COPD) and congestive heart failure (CHF) [18].  
5  
6

### 7 **Objective 1 – Overall health system costs due to PIP**

#### 8 **Exposure**

9  
10 The subset of STOPP/START criteria applicable to health administrative databases were  
11 identified based on the availability of the data necessary for their use and coded into a format  
12 applicable to ICES-housed health administrative data using a combination of medication,  
13 diagnostic (i.e. International Classification of Diseases Codes), health care services utilization  
14 and physician billing codes. This process identified 64% of STOPP criteria and 27% of START  
15 criteria as applicable to health administrative data available through ICES. A manuscript  
16 describing the coding process in detail is in preparation [19].  
17  
18

19  
20 The exposure of interest will be the first occurrence of any PIP identified using health  
21 administrative databases for each patient in the cohort during the study accrual period from April  
22 1 2003 to December 31 2014. Unexposed patients will be those who have not experienced any  
23 PIP during the study accrual period.  
24  
25

#### 26 **Outcome**

27  
28 The primary outcome will be the combined medication, hospitalization and ED visit costs  
29 attributable to PIP paid by the Ontario Ministry of Health and Long-Term Care over the three  
30 months following a PIP. These costs, from documented clinical events attributable to PIP, will be  
31 identified via population attributable fraction (PAF) methods [20,21]. To identify costs, the ICES  
32 costing algorithm will be used [22]. This algorithm allows for the identification of costs from any  
33 health services covered by the Ontario Health Insurance Plan over a defined time-period [22].  
34 All costs will be inflated to 2015 Canadian dollars using Statistic Canada's Consumer Price  
35 Index [23]. The PAF estimates for hospitalizations, ED visits and medications will be derived via  
36 the incidence rate ratios (IRR) obtained from Poisson or negative binomial regression models for  
37 each outcome, described in further detail in the statistical analyses section. Each PAF estimate  
38 will then be multiplied by the total cost of their respective health care service over the study  
39 period for the whole population, which will be totaled to obtain the total costs attributable to PIP  
40 over the study period.  
41  
42  
43  
44

45  
46 Though we realize not all hospitalizations and ED visits will be causally related with PIP, ADEs  
47 are frequently under-recognized during ED visits and hospitalization [24,25]. As such, we chose  
48 to use reliably documented clinical events (hospitalization and ED visits) and their costs, along  
49 with medication costs, as most suitable for the primary outcome. These costs were selected as  
50 they are the costs associated with the most reliably documented clinical events and those most  
51 likely to be linked to PIP. For medication costs, only those attributable to STOPP criteria will be  
52 determined and patients with PIP who either have a START criterion as their first PIP, or as one  
53 of multiple first PIPs, will be excluded from this analysis. This is to ensure all drug costs are  
54 attributable to the prescribing of a medication (i.e. STOPP criteria) and not to the omission of  
55 medication (i.e. START criteria), which would in fact result in a reduction in costs.  
56  
57  
58  
59  
60

## Covariates

Analyses will be adjusted for potential confounders which are available through provincial health administrative databases and either known or perceived to be associated with PIP or with our outcomes of interest (i.e. hospitalization, ED visits and medication use), including age [26,27], sex [27], income quintile [27,28], rurality, aggregated diagnosis group (ADG) score (i.e. comorbidity status) [27,29,30], number of unique drug identification numbers (i.e. pills prescribed concurrently) in year prior to PIP [31–35], number of prescribers in year prior to PIP [36], whether the patient had a MedsCheck (billable medication review performed by a pharmacist, usually in the community) in year prior to PIP, number of days spent in hospital in year prior to PIP, ED visit in 6 months prior to PIP [26,27,29,37–41].

For this objective, the ascertainment of covariate status will be done at the PIP date for participants experiencing a PIP and at the randomly assigned index date for participants who do not experience a PIP, as further described below.

## Statistical analyses

The direct costs associated with the occurrence of any first PIP in Ontario will be estimated by combining medication and non-medication related costs attributable to PIP via the steps below.

### *Assignment of time-to-PIP for unexposed patients*

To estimate the health system costs due to PIP, it is necessary to compare the number of days spent in hospital, the number of ED visits, and the volume of medications in participants with and without PIP. To do this, we will need to assign an index date to participants without PIP so that they have comparable lookback and observation windows for covariate and outcome ascertainment, respectively. The index date for participants not experiencing a PIP will be treated as missing at random. We will conduct parametric survival analysis on the participants within the cohort who have experienced a PIP, with their time-to-first PIP from cohort entry as the response variable in the model. The models will be stratified by sex and median-age during cohort participation according to the following categories: 66-70, 71-75, 76-80, 81-85, 86-90, over 90. The models will be fitted to identify the appropriate distribution for its random error component. Once the best fitting model has been identified, the resulting distribution and appropriate shape and scale parameters, depending on the distribution identified, will be applied to the participants without a PIP via the random number function in SAS [42] in order to randomly assign them a PIP date and identify the start of their 90-day observation window. This random assignment will be done twice, with the first randomly assigned PIP index used for the primary analyses and most other subgroup and sensitivity analyses, while the second will be used to conduct a sensitivity analysis to determine whether the random assignment method used impacts study results. Participants with an assigned PIP date that falls beyond the end of their follow-up period will be excluded from all analyses. For both exposed and unexposed participants, we will

1  
2  
3 determine whether they have at least 90 days between their PIP date and the end of their follow-  
4 up. If this difference is less than 90 days participants will be removed from the analysis.  
5  
6

7 This approach to assignment of an index date in non-PIP participants was selected over simple  
8 random assignment of time-to-PIP since the underlying distribution of time-to-first PIP in  
9 participants experiencing PIP is unknown and is not believed to be normally distributed and is  
10 also thought to vary by age and sex. We do not consider matching as an option due to the high  
11 prevalence of PIP in the older population resulting in a difficulty to find suitable matches for all  
12 participants with a PIP. Additionally, the first day of a participant's inclusion in the study  
13 population for participants without PIP cannot be used as their PIP date as this would make the  
14 unexposed group systematically younger than those exposed to PIP during analyses, resulting in  
15 confounding that may not be completely adjusted for even though age is being included in  
16 analyses as a covariate.  
17  
18  
19  
20

### 21 *Medication use, ED visits and hospitalizations attributable to PIP*

  
22

23 The IRRs for ED visits, days spent in hospital and medications for participants with PIP versus  
24 those without PIP will be determined via parameter estimates for the PIP variable from  
25 regression models for count data. Three models will be created, each with the response variable  
26 of either count of ED visits, days spent in hospital and total number of unique, newly prescribed  
27 medications in the 90-day period following their PIP date for participants with PIP, or the  
28 randomly assigned index date for participants not experiencing a PIP. Each of the models will be  
29 adjusted for the covariates listed previously. For each outcome, either a Poisson or negative  
30 binomial model will be fitted based on a comparison of the mean of the response variable with  
31 its variance to determine if overdispersion is present [43]. Should the mean and variance be  
32 equal, or approximately so, then the Poisson model will be used. If the variance is greater and  
33 proportional to the mean, indicating overdispersion, then the negative binomial model will be  
34 used. The IRRs obtained via the parameter estimate for the PIP variable in the best fitting model  
35 for each outcome will be used to derive their respective population attributable fraction (PAF) in  
36 combination with the proportion of the population exposed to PIP ( $P_{exp}$ ), obtained directly from  
37 our cohort as the PIP prevalence in the whole study population, via Levin's formula:  $((P_{exp} * (RR - 1)) / ((P_{exp} * (RR - 1)) + 1)) * 100$  [20,21].  
38  
39  
40  
41  
42  
43

### 44 *Total costs attributable to PIP*

  
45

46 The respective PAFs for ED visits, days spent in hospital and medications will be multiplied by  
47 the total costs for each of these health services, respectively, to obtain the total cost of each  
48 service use attributable to PIP over the study period. These costs will then be combined to obtain  
49 the total health system costs attributable to PIP over the study period. The same methods will be  
50 used to obtain costs attributable to PIP by year.  
51  
52  
53

### 54 *Subgroup analyses*

  
55  
56  
57  
58  
59  
60

1  
2  
3 Similar methods to those listed above will be conducted in order to obtain the costs attributable  
4 to PIP by age, categorized by the median age of cohort participation based on the categories  
5 described above, and sex. Additionally, a subgroup analysis for the ED visit and hospitalization  
6 costs will be conducted based on whether a patient's first PIP was a STOPP or START criteria,  
7 with patients experiencing multiple first PIPs excluded.  
8  
9

## 14 **Objective 2 – Incremental costs of specific PIP criteria**

### 16 Exposure

18 PIP will be identified using the same methods described in objective 1. Specific PIP criteria will  
19 be selected for the assessment of the incremental costs associated with each of them. For each of  
20 the criteria studied, the exposure of interest will be the first time the PIP of interest occurred for  
21 each participant in the cohort. Exposed participants must have never experienced another PIP  
22 prior to the PIP date, as well as during the 90-day observation window. Unexposed participants  
23 will not have experienced any PIP during their cohort participation.  
24  
25

26 To identify the PIPs to model, each of the individual PIPs applicable to health administrative  
27 data was plotted on a graph according to their frequency (y-axis) by their crude average  
28 healthcare services costs (i.e. medication, hospitalization and ED visits combined (x-axis),  
29 **Figure 2.** Two STOPP criteria falling on the high frequency/high-cost plane were identified due  
30 to their potential for being high impact PIPs, along with a high frequency START criterion  
31 which also fell on this plane. A low frequency/low cost STOPP criteria was chosen to be used for  
32 comparison. The PIPs identified were: START A6, STOPP J6, STOPP K2, STOPP D8. START  
33 A6 is defined as the omission of Angiotensin Converting Enzyme (ACE) inhibitor with systolic  
34 heart failure and/or documented coronary artery disease. STOPP K2 is defined as the use of any  
35 neuroleptic drug. STOPP D8 is flagged as a PIP when anticholinergics and or antimuscarinics  
36 are prescribed in participants with delirium or dementia, due to risk of exacerbation of cognitive  
37 impairment. The final selected PIP, STOPP J6, is defined as the prescribing of androgens (male  
38 sex hormones) in the absence of primary or secondary hypogonadism. The full definitions as  
39 they appear in the STOPP/START criteria for each of the selected criteria are described in **Table**  
40 **1,** along with their categorized frequency and crude costs [5].  
41  
42  
43  
44  
45  
46

### 47 Outcome

49 The outcome will be the combined hospitalization, ED visit and PIP medication costs in the 90-  
50 day period following the PIP date. The ED visit and hospitalization costs will be obtained via the  
51 ICES costing algorithm [22] and inflated to 2017 Canadian dollars. Like the hospitalization and  
52 ED visit costs, we will attempt to obtain the PIP medication cost via the ICES costing algorithm,  
53 though it may not be possible to obtain only the medication cost for the PIP medication, as the  
54 macro currently obtains all medication costs over a designated period as opposed to the costs of  
55  
56  
57  
58  
59  
60



1  
2  
3 each individual medication. Should we be unable to obtain PIP medication costs via the macro,  
4 we will identify the lowest hypothetical medication costs for each PIP via the Prescribe Smart  
5 mobile application [44], which provides the drug unit price of all available drugs within Ontario  
6 and allows for easy comparison within class, at the World Health Organization Defined Daily  
7 Dose for each drug [45]. The drug cost of a daily dose will be multiplied by 90 to obtain the most  
8 conservative estimate of a 90-day supply to match the observation window. The highest and  
9 median prices for each PIP will also be obtained and utilized in sensitivity analyses, should this  
10 approach be used, to observe the PIP costing method's impact on incremental costs.  
11  
12  
13  
14

### 15 Covariates

16  
17 The covariates of interest for objective 2 will be the same as in objective 1. Where they differ is  
18 in the assignment of the PIP date for ascertainment of covariate status in participants not  
19 experiencing a PIP. In objective 2, a subset of participants not experiencing a PIP will be  
20 selected for inclusion into the analysis based on having an exact, or similar, index date as a  
21 participant with a PIP. Once included, participants without a PIP will be assigned the same PIP  
22 date as the person with whom they share the exact or similar index date. This approach to  
23 participant inclusion and PIP date assignment has been selected since an efficient approach for  
24 participant selection and PIP date assignment that would be least likely to bias study results is  
25 necessary. The number of participants with the PIPs of interest ranges from several thousand to  
26 over 200,000, thus the number of unexposed participant's needs to be reduced in size for each of  
27 the analyses, precluding the inclusion of all unexposed participants in the cohort. Additionally,  
28 the index date is the least likely of all available covariates at time of participant selection to be  
29 associated with PIP or cost and outcomes, thus reducing the potential of introducing bias in  
30 participant selection.  
31  
32  
33  
34

### 35 Statistical analyses

36  
37 The incremental costs associated with having each of the individual PIP criterion described in  
38 **Table 1** versus not having the PIP in question will be modelled using regression analyses. Due to  
39 the typical distribution associated with cost data, multiple candidate models will be assessed to  
40 identify the model that best fits the data. This process will begin with the fitting of an ordinary  
41 least squares regression and assessment of model fit, as well as a check for heteroscedasticity. If  
42 there is evidence of heteroscedasticity, we will then proceed with the selection of a generalized  
43 linear model. The link function and variance structure to be used will be determined using the  
44 TRANSREG function in SAS and modified Park's test, respectively. Should the Poisson  
45 variance structure be selected, the mean of the costs will be compared to the variance to  
46 determine whether overdispersion is present and whether a negative binomial model is preferred.  
47 All candidate models will be adjusted for the covariates described above. Each model's  
48 performance will be assessed using the Bayesian information criterion (BIC) and graphical check  
49 of the distribution fit comparing the distribution of the predicted values with the expected values.  
50  
51  
52  
53

### 54 Patient and public involvement

1  
2  
3 The research questions addressed by this protocol were informed by the values and preferences  
4 of patients with regards to reducing their medication burden and improving their health  
5 outcomes, though no patients or public were directly involved in the development of this  
6 protocol. Results of this study will be disseminated to patient groups within our research  
7 networks.  
8  
9  
10  
11  
12  
13  
14  
15  
16  
17  
18  
19  
20  
21  
22  
23  
24  
25  
26  
27  
28  
29  
30  
31  
32  
33  
34  
35  
36  
37  
38  
39  
40  
41  
42  
43  
44  
45  
46  
47  
48  
49  
50  
51  
52  
53  
54  
55  
56  
57  
58  
59  
60

## **ETHICS AND DISSEMINATION**

### **Ethical approval, safety and confidentiality considerations**

This study was approved by the institutional review board at Sunnybrook Health Sciences Centre, Toronto, Canada. This study makes use of previously collected health administrative databases housed at ICES, accessed from ICES@uOttawa, and does not require any additional intervention or data collection at the patient level. ICES links de-identified population-based health information at the population level in a way that ensures privacy and confidentiality to participants. As per ICES procedures, cell sizes of less than five will not be reported to address concerns about possible breaches of confidentiality.

### **Dissemination**

Dissemination will primarily occur via publication of study results and presentation at national and international conferences. Professional networks will be utilized to promote dissemination with various stakeholders, including health policy makers at the provincial and national levels.

### **Statement of originality**

The assessment of the economic burden of PIP and PIO at the population-level using linked health administrative databases is the first of its kind in any jurisdiction to the best of our knowledge. This is the first study of its kind leveraging linked health administrative databases to assess the health services costs of PIP and PIO beyond the medication costs alone, as well as the first study that will be able to adjust for potential confounders beyond age and sex.

### **Anticipated limitations**

Our study is subject to limitations that are common to studies relying on health administrative databases which may affect our estimates of the prevalence of PIP and associated costs. It cannot be confirmed that participants adhered to the instructions regarding the medications dispensed to them, or regularly took them. Adherence to medication can only be assessed by comparing the date when an original prescription was scheduled to expire with the dispensation date of the renewal prescription. It is also difficult to determine whether some of the PIP identified by the STOPP/START criteria are indeed inappropriate without clinical or diagnostic data that are unavailable to us [46]. Some of the STOPP/START criteria include over-the-counter medications or medications that are not covered by Ontario's public medication plan (ODB), and thus are not captured in the ODB database (ODBD) or identified as a PIP in our database. Additionally, we are unable to determine the cost of PIP medications from the linked health administrative databases due to the complexity and time required to identify specific prescriptions from a total of over half a billion prescriptions. As such, a conservative approach will be used to identify medication costs as described in the outcomes section. Despite these limitations, we are confident our study will produce useful, conservative estimates of the health system costs associated with PIP.

## **AUTHOR CONTRIBUTIONS**

LMB wrote the original grant application for this project and conceived the initial idea. CB led the development of this subsequent protocol. The final methodology listed in this protocol was developed collaboratively by CB, LMB, KT, DC and GS, with LMB, KT, DC and GS providing expertise in their respective fields. Additionally, CB, LMB, KT, DC and GS reviewed the manuscript for important intellectual content, made suggestions for improvement as appropriate, and approved the final version.

## **COMPETING INTERESTS**

None to declare

## **FUNDING**

This work was supported by the Canadian Institutes of Health Research (CIHR), grant number 287245-HPM-BRUY-46830 (Principal investigator: Dr. Lise M. Bjerre). CB is supported by a CIHR Drug Safety and Effectiveness Cross-disciplinary Training program traineeship and a University of Ottawa Excellence Scholarship.

## Tables and Figures

**Table 1.** Definitions for PIP criteria to be modelled as part of the second objective, along with their frequency and cost classification

| PIP         | Definition                                                                                                                                                               | PIP Frequency | Costs |
|-------------|--------------------------------------------------------------------------------------------------------------------------------------------------------------------------|---------------|-------|
| START<br>A6 | Angiotensin Converting Enzyme (ACE) inhibitor with systolic heart failure and/or documented coronary artery disease                                                      | High          | Mid   |
| STOPP<br>K2 | Neuroleptic drugs                                                                                                                                                        | Mid           | Mid   |
| STOPP<br>D8 | Anticholinergics/antimuscarinics in patients with delirium or dementia (risk of exacerbation of cognitive impairment)                                                    | Low           | High  |
| STOPP<br>J6 | Androgens (male sex hormones) in the absence of primary or secondary hypogonadism (risk of androgen toxicity; no proven benefit outside of the hypogonadism indication). | Low           | Low   |

1  
2  
3 **Figure 1.** Definition of observation period  
4

5 **Figure 2.** Assessment of PIP frequency by crude costs (from hospitalizations, emergency  
6 department visits and medications) to determine PIP scenarios to be modelled.  
7  
8  
9  
10  
11  
12  
13  
14  
15  
16  
17  
18  
19  
20  
21  
22  
23  
24  
25  
26  
27  
28  
29  
30  
31  
32  
33  
34  
35  
36  
37  
38  
39  
40  
41  
42  
43  
44  
45  
46  
47  
48  
49  
50  
51  
52  
53  
54  
55  
56  
57  
58  
59  
60

For peer review only

## REFERENCES

1. Spinewine A, Schmader KE, Barber N et al. Appropriate prescribing in elderly people: how well can it be measured and optimised? *Lancet*. 2007;370(1474):173–84.
2. Laroche ML, Charmes JP, Nouaille Y et al. Is inappropriate medication use a major cause of adverse drug reactions in the elderly? *Br J Clin Pharmacol*. 2007;63(306):177–86.
3. Lazarou J, Pomeranz BH, Corey PN. Incidence of adverse drug reactions in hospitalized patients: a meta-analysis of prospective studies. *JAMA*. 1998;279(0098–7484):1200–5.
4. Fulton M, Allen E. Polypharmacy in the elderly: a literature review. *J Am Acad Nurse Pr*. 2005;17(4):123–32.
5. O’Mahony D, O’Sullivan D, Byrne S et al. STOPP/START criteria for potentially inappropriate prescribing in older people: version 2. *Age Ageing*. 2015;44(2):213–8.
6. Beers MH, Ouslander JG, Rollinger I et al. Explicit criteria for determining inappropriate medication use in nursing home residents. *Arch Intern Med. Am Med Assoc*; 1991;151(9):1825.
7. Beers MH. Explicit Criteria for Determining Potentially Inappropriate Medication Use by the Elderly: An Update. *Arch Intern Med*. 1997;157(14):1531–6.
8. Fick DM, Cooper JW, Wade WE et al. Updating the Beers criteria for potentially inappropriate medication use in older adults: results of a US consensus panel of experts. *Arch Intern Med. Am Med Assoc*; 2003;163(22):2716.
9. American Geriatrics Society 2012 Beers Criteria Update Expert Panel. American Geriatrics Society updated Beers Criteria for potentially inappropriate medication use in older adults. *J Am Geriatr Soc*. 2012;60(4):616–31.
10. American Geriatrics Society 2015 Beers Criteria Update Expert Panel. American Geriatrics Society 2015 Updated Beers Criteria for Potentially Inappropriate Medication Use in Older Adults. *J Am Geriatr Soc*. 2015;63(11):2227–46.
11. Bradley M, Fahey T, Cahir C et al. Potentially inappropriate prescribing and cost outcomes for older people: a cross-sectional study using the Northern Ireland Enhanced Prescribing Database. *Eur J Clin Pharmacol*. 2012;68(10):1–9.
12. Shah SM, Carey IM, Harris T et al. Quality of prescribing in care homes and the community in England and Wales. *Br J Gen Pract*. 2012;62(598):e329–36.
13. Goltz L. Original Research-Potentially inappropriate prescribing for elderly outpatients in Germany: a retrospective claims data analysis. *Int J Clin Pharmacol Ther*. 2012;50(3):185.
14. Bjerre L, Ramsay T, Cahir C et al. Assessing potentially inappropriate prescribing (PIP) and predicting patient outcomes in Ontario’s older population: a population-based cohort study applying subsets of the STOPP/START and Beers’ criteria in large health administrative databases. *BMJ Open*. 2015;5(e010156).
15. Bronskill S, Carter M, Costa A et al. Aging in Ontario : An ICES Chartbook of Health Service Use by Older Adults [Internet]. 2010. Available from:

- 1  
2  
3 <https://www.ices.on.ca/Publications/Atlases-and-Reports/2010/Aging-in-Ontario>  
4
- 5 16. Institute for Clinical Evaluative Sciences (ICES). Health Services Data.  
6 [http://www.ices.on.ca/webpage.cfm?site\\_id=1&org\\_id=26&morg\\_id=0&gsec\\_id=5314&item\\_id=5326](http://www.ices.on.ca/webpage.cfm?site_id=1&org_id=26&morg_id=0&gsec_id=5314&item_id=5326). 2011.  
7  
8
- 9 17. Institute for Clinical Evaluative Sciences. ICES Data Dictionary [Internet]. 2016.  
10 Available from:  
11 <https://datadictionary.ices.on.ca/Applications/DataDictionary/Default.aspx>  
12
- 13 18. Institute for Clinical Evaluative Sciences. Datasets available through Data & Analytic  
14 Services [Internet]. [cited 2018 Feb 2]. Available from:  
15 <https://datadictionary.ices.on.ca/applications/datadictionary/Default.aspx?viewmode=Data>  
16 Services  
17
- 18 19. Bjerre L, Halil R, Catley C et al. Identifying potentially inappropriate prescribing in whole  
19 populations: Coding the STOPP/START and Beers criteria for use with large, routinely  
20 collected population datasets. Manuscr Prep. 2017;  
21
- 22 20. Rockhill B, Newman B, Weinberg C. Use and misuse of population attributable fractions.  
23 *Am J Public Heal*. 1998;88(1):15–9.  
24
- 25 21. Levin M. The occurrence of lung cancer in man. *Acta Union Int Contra Cancrum*.  
26 1953;9(531–41).  
27
- 28 22. Wodchis W, Buchmeneva K, Nikitovic M et al. Guidelines on person-level costing using  
29 administrative databases in Ontario [Internet]. Toronto; 2013. Report No.: 1. Available  
30 from:  
31 [http://www.hsprn.ca/uploads/files/Guidelines\\_on\\_PersonLevel\\_Costing\\_May\\_2013.pdf](http://www.hsprn.ca/uploads/files/Guidelines_on_PersonLevel_Costing_May_2013.pdf)  
32  
33
- 34 23. Statistics Canada. Consumer price indexes. 2017.  
35
- 36 24. Hohl C, Zed P, Brubacher J et al. Do emergency physicians attribute drug-related  
37 emergency department visits to medication- related problems? *Ann Emerg Med*.  
38 2010;55:493–502.  
39
- 40 25. Hohl C, Robitaille C, Lord V et al. Emergency physician recognition of adverse drug-  
41 related events in elder patients presenting to an emergency department. *Acad Emerg Med*.  
42 2005;12:197–205.  
43
- 44 26. Boulton C, Dowd B, McCaffrey D et al. Screening elders for risk of hospital admission. *J*  
45 *Am Geriatr Soc*. 1993;41(8):811–7.  
46
- 47 27. Anderson GF, Steinberg EP. Predicting hospital readmissions in the Medicare population.  
48 *Inquiry*. 1985;22(3):251–8.  
49
- 50 28. Weissman J, Stern R, Epstein A. The impact of patient socioeconomic status and other  
51 social factors on readmission: a prospective study in four Massachusetts hospitals.  
52 *Inquiry*. 1994;31(2):163–72.  
53
- 54 29. Krumholz HM, Parent EM, Tu N et al. Readmission after hospitalization for congestive  
55 heart failure among Medicare beneficiaries. *Arch Intern Med*. 1997;157(1):99–104.  
56  
57  
58  
59  
60



- 1
- 2
- 3 30. MH C, L G. Correlates of early hospital readmission or death in patients with congestive
- 4 heart failure. *Am J Cardiol.* 1997. p. 1640–4.
- 5
- 6 31. Hajjar ER, Cafiero AC, Hanlon JT. Polypharmacy in elderly patients. *Am J Geriatr*
- 7 *Pharmacother.* Elsevier; 2007;5(4):345–51.
- 8
- 9 32. Bates DW, Miller EB, Cullen DJ et al. Patient risk factors for adverse drug events in
- 10 hospitalized patients. ADE Prevention Study Group. *Arch Intern Med.* 1999;159(0003–
- 11 9926):2553–60.
- 12
- 13 33. Carey IM, De WS, Harris T et al. What factors predict potentially inappropriate primary
- 14 care prescribing in older people? Analysis of UK primary care patient record database.
- 15 *Drugs Aging.* 2008;25(1170–229X):693–706.
- 16
- 17 34. Evans RS, Lloyd JF, Stoddard GJ et al. Risk factors for adverse drug events: a 10-year
- 18 analysis. *Ann Pharmacother.* 2005;39(1060–0280):1161–8.
- 19
- 20 35. Kanjanarat P, Winterstein AG, Johns TE et al. Nature of preventable adverse drug events
- 21 in hospitals: a literature review. *Am J Heal Syst Pharm.* 2003;60(1079–2082):1750–9.
- 22
- 23 36. Dhalla IA, Anderson GM, Mamdani MM et al. Inappropriate prescribing before and after
- 24 nursing home admission. *J Am Geriatr Soc.* 2002;50(0002–8614):995–1000.
- 25
- 26 37. Phillips RS, Safran C, Cleary PD et al. Predicting emergency readmissions for patients
- 27 discharged from the medical service of a teaching hospital. *J Gen Intern Med.*
- 28 1987;2(6):400–5.
- 29
- 30 38. Reed RL, Pearlman R a, Buchner DM. Risk factors for early unplanned hospital
- 31 readmission in the elderly. *J Gen Intern Med.* 1989;6(3):223–8.
- 32
- 33 39. Corrigan JM, Martin JB. Identification of factors associated with hospital readmission and
- 34 development of a predictive model. *Health Serv Res.* 1992;27(1):81–101.
- 35
- 36 40. Colledge NR, Ford MJ. The early hospital readmission of elderly people. *Scott Med J.*
- 37 1994;39(2):51–2.
- 38
- 39 41. van Walraven C, Mamdani M, Fang J et al. Continuity of care and patient outcomes after
- 40 hospital discharge. *J Gen Intern Med.* 2004;19(6):624–31.
- 41
- 42 42. SAS Institute Inc. SAS® 9.4 Functions and CALL Routines: Reference, Fifth Edition.
- 43 Cary, NC; 2016.
- 44
- 45 43. Weaver C, Ravani P, Oliver M et al. Analyzing hospitalization data: potential limitations
- 46 of Poisson regression. *Nephrol Dial Transpl.* 2015;30:1244–9.
- 47
- 48 44. Litman J. Prescribe Smart Application. Ottawa, ON; 2016.
- 49
- 50 45. WHO Collaborating Centre for Drug Statistics Methodology. ATC/DDD Index 2018
- 51 [Internet]. 2018. Available from: [https://www.whocc.no/atc\\_ddd\\_index/](https://www.whocc.no/atc_ddd_index/)
- 52
- 53 46. Ryan C, O’Mahony D, O’Donovan DÓ et al. A comparison of the application of
- 54 STOPP/START to patients’ drug lists with and without clinical information. *Int J Clin*
- 55 *Pharm.* 2013;35(2):230–5.
- 56
- 57
- 58
- 59
- 60

1  
2  
3  
4  
5  
6  
7  
8  
9  
10  
11  
12  
13  
14  
15  
16  
17  
18  
19  
20  
21  
22  
23  
24  
25  
26  
27  
28  
29  
30  
31  
32  
33  
34  
35  
36  
37  
38  
39  
40  
41  
42  
43  
44  
45  
46  
47  
48  
49  
50  
51  
52  
53  
54  
55  
56  
57  
58  
59  
60

For peer review only

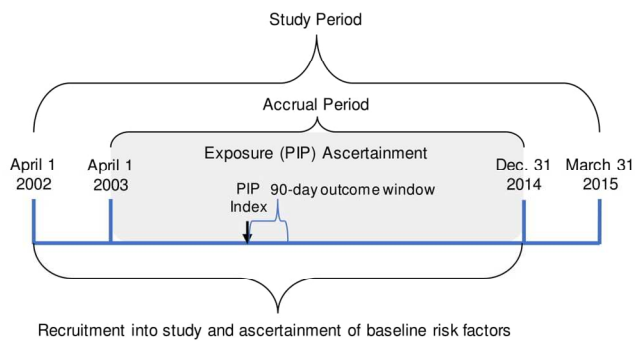

Figure 1. Definition of observation period

127x169mm (300 x 300 DPI)

1  
2  
3  
4  
5  
6  
7  
8  
9  
10  
11  
12  
13  
14  
15  
16  
17  
18  
19  
20  
21  
22  
23  
24  
25  
26  
27  
28  
29  
30  
31  
32  
33  
34  
35  
36  
37  
38  
39  
40  
41  
42  
43  
44  
45  
46  
47  
48  
49  
50  
51  
52  
53  
54  
55  
56  
57  
58  
59  
60

Figure 2. Assessment of PIP frequency by crude costs (from hospitalizations, emergency department visits and medications) to determine PIP scenarios to be modelled.

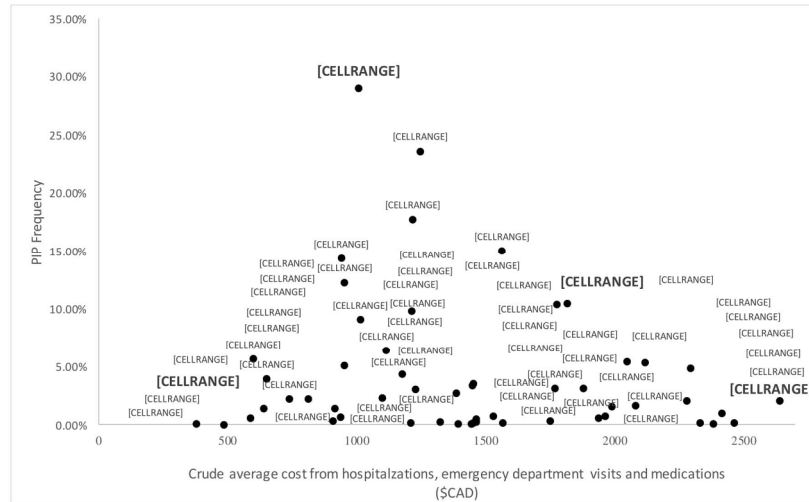

Figure 2. Assessment of PIP frequency by crude costs (from hospitalizations, emergency department visits and medications) to determine PIP scenarios to be modelled.

186x143mm (300 x 300 DPI)

## Appendix

### A. Brief description of data sources

*Adapted with permission from:*

Bjerre L, Ramsay T, Cahir C et al. Assessing potentially inappropriate prescribing (PIP) and predicting patient outcomes in Ontario's older population: a population-based cohort study applying subsets of the STOPP/START and Beers' criteria in large health administrative databases. *BMJ Open*. 2015;5(e010156).

*Ontario Drug Benefits Claims Database (ODBD)*. The Ontario Drug Benefit program provides drug benefits for all Ontario residents aged 65 and older and those with disability/social assistance benefits. The ODBD contains a number of data related to prescription drugs, including drug identification number (DIN), quantity of drugs provided, number of days supplied (which can be used to compute the daily dose), itemized cost, dispensing fee, long-term care indicators, the plan affiliated with the prescription (e.g. Seniors, Trillium, Ontario Works etc.), the date the drug was dispensed, and patient and prescriber identifiers (encrypted). Additionally, ICES maintains a list linking DINs to their associated drug and product names, subclass information, pharmacologic-therapeutic classification group (PCG) codes, drug strength, route of administration, and first and last dispensing dates from the ODB.[1]

*Discharge Abstract Database (DAD)*. The DAD captures all acute care hospitalizations in Ontario dating back to 1988. Each row in the DAD records demographic, diagnostic, procedural, and treatment information for a given hospitalization. [1]

*Same Day Surgery Database (SDS)*. The SDS contains patient-level data for day surgery institutions in Ontario. Every record corresponds to one same-day surgery or procedure stay. [1]

*National Ambulatory Care Reporting System (NACRS)*. The NACRS captures all visits to hospital EDs beginning in 2002. As with the DAD, each row of the NACRS contains demographic, diagnostic, procedural, and treatment information for each emergency room visit [35]. [1]

*Ontario Health Insurance Plan (OHIP) database*. The OHIP database captures health services billing claims paid by the Ontario Health Insurance Plan to providers. Each row in the OHIP database records the patient, provider, and diagnosis/procedure being claimed for remuneration. [1]

Birth date and death date of every individual eligible for Ontario health service will be obtained from the *Registered Persons Database (RPDB)*. [1]

1. Institute for Clinical Evaluative Sciences. ICES Data Dictionary [Internet]. 2016. Available from: <https://datadictionary.ices.on.ca/Applications/DataDictionary/Default.aspx>
